# Supplementary material for: SYBR®Green qPCR Salmonella detection system allowing discrimination at the genus, species and subspecies levels
Source: PubMed Central journal article supplement — Appl Microbiol Biotechnol. 2013 Oct 11;97(22):9811–24. doi: 10.1007/s00253-013-5234-x (PMC3825158; doi:10.1007/s00253-013-5234-x), 2013-10-11
Supplement: 253_2013_5234_MOESM1_ESM.pdf [file 253_2013_5234_MOESM1_ESM.pdf]

**Title: SYBR®Green qPCR *Salmonella* detection system allowing discrimination at the genus, species and subspecies levels**

**Journal name: Applied Microbiology and Biotechnology**

**Authors: Elodie BARBAU-PIEDNOIR<sup>1</sup>, Sophie BERTRAND<sup>1</sup>, Jacques MAHILLON<sup>2</sup>, Nancy H. ROOSENS<sup>1\*</sup>, and Nadine BOTTELDOORN<sup>1\*</sup>**

*\* These authors have equally contribute to this work*

**Authors affiliations:**

<sup>1</sup>Scientific Institute of Public Health, J. Wytsmanstraat 14, 1050 Brussels, Belgium,

<sup>2</sup>Université catholique de Louvain, Faculty of Bioscience Engineering, Earth and Life Institute, boite L7.05.12, 1348 Louvain-la-Neuve, Belgium

Corresponding author e-mail address:

nadine.botteldoorn@wiv-isp.be



Table S2: Reproducibility test of the seven SYBR®Green *Salmonella* spp., *Salmonella enterica* and *Salmonella enterica enterica* detection methods.

|          |    | Sample                                           | S.ent.ent. Agona | S.ent.ent. Derbi | S.ent.ent. Frederiksberg | S.ent.ent. London | S.ent.ent. Marseille | S.ent.ent. Muenchen | S.ent.ent. Paratyphi C | S.ent.ent. Poona | S.ent.ent. Typhi | Method Reproducibility standard deviation (s <sub>R</sub> ) | Uncertainty (99%) |
|----------|----|--------------------------------------------------|------------------|------------------|--------------------------|-------------------|----------------------|---------------------|------------------------|------------------|------------------|-------------------------------------------------------------|-------------------|
|          |    | Copy number                                      | 50               | 20               | 50                       | 50                | 100                  | 100                 | 50                     | 20               | 20               |                                                             |                   |
| invA-5   | Cq | Average Lab 1                                    | 28.35            | 27.87            | 27.84                    | 29.50             | 27.23                | 27.56               | 26.70                  | 30.33            | 29.21            | 0.894                                                       | 2.68              |
|          |    | Average Lab 2                                    | 29.51            | 29.40            | 29.79                    | 30.89             | 27.87                | 28.23               | 27.70                  | 31.17            | 31.21            |                                                             |                   |
|          |    | RSD <sub>R</sub> (%)                             | 2.85             | 3.77             | 4.79                     | 3.25              | 1.64                 | 1.71                | 2.61                   | 1.93             | 4.68             |                                                             |                   |
|          |    | R                                                | 2.31             | 3.02             | 3.86                     | 2.75              | 1.26                 | 1.33                | 1.99                   | 1.66             | 3.96             |                                                             |                   |
|          |    | (y <sub>iA</sub> -y <sub>iB</sub> ) <sup>2</sup> | 1.36             | 2.33             | 3.81                     | 1.93              | 0.41                 | 0.45                | 1.01                   | 0.70             | 4.00             |                                                             |                   |
|          | Tm | Average Lab 1                                    | 81.00            | 80.75            | 80.50                    | 81.00             | 80.75                | 81.00               | 81.00                  | 80.50            | 80.50            | 0.313                                                       | 0.94              |
|          |    | Average Lab 2                                    | 80.80            | 80.40            | 79.95                    | 80.25             | 80.60                | 80.60               | 80.55                  | 80.25            | 79.80            |                                                             |                   |
|          |    | RSD <sub>R</sub> (%)                             | 0.17             | 0.31             | 0.48                     | 0.66              | 0.13                 | 0.35                | 0.39                   | 0.22             | 0.62             |                                                             |                   |
|          |    | R                                                | 0.40             | 0.69             | 1.09                     | 1.48              | 0.30                 | 0.79                | 0.89                   | 0.49             | 1.39             |                                                             |                   |
|          |    | (y <sub>iA</sub> -y <sub>iB</sub> ) <sup>2</sup> | 0.04             | 0.12             | 0.30                     | 0.56              | 0.02                 | 0.16                | 0.20                   | 0.06             | 0.49             |                                                             |                   |
| rpoD-20  | Cq | Average Lab 1                                    | 28.72            | 28.76            | 28.49                    | 30.48             | 27.91                | 28.10               | 26.97                  | 30.32            | 29.93            | 0.803                                                       | 2.41              |
|          |    | Average Lab 2                                    | 29.72            | 30.31            | 29.32                    | 31.96             | 28.72                | 28.39               | 28.59                  | 31.31            | 31.43            |                                                             |                   |
|          |    | RSD <sub>R</sub> (%)                             | 2.43             | 3.70             | 2.04                     | 3.37              | 2.02                 | 0.73                | 4.12                   | 2.28             | 3.46             |                                                             |                   |
|          |    | R                                                | 1.99             | 3.06             | 1.65                     | 2.95              | 1.60                 | 0.58                | 3.21                   | 1.97             | 2.97             |                                                             |                   |
|          |    | (y <sub>iA</sub> -y <sub>iB</sub> ) <sup>2</sup> | 1.01             | 2.39             | 0.69                     | 2.21              | 0.65                 | 0.08                | 2.62                   | 0.99             | 2.25             |                                                             |                   |
|          | Tm | Average Lab 1                                    | 78.00            | 77.75            | 78.00                    | 78.00             | 78.00                | 78.00               | 78.00                  | 78.00            | 78.00            | 0.440                                                       | 1.32              |
|          |    | Average Lab 2                                    | 77.40            | 77.25            | 77.25                    | 76.95             | 77.40                | 77.60               | 77.60                  | 77.40            | 77.25            |                                                             |                   |
|          |    | RSD <sub>R</sub> (%)                             | 0.55             | 0.46             | 0.68                     | 0.96              | 0.55                 | 0.36                | 0.36                   | 0.55             | 0.68             |                                                             |                   |
|          |    | R                                                | 1.19             | 0.99             | 1.48                     | 2.08              | 1.19                 | 0.79                | 0.79                   | 1.19             | 1.48             |                                                             |                   |
|          |    | (y <sub>iA</sub> -y <sub>iB</sub> ) <sup>2</sup> | 0.36             | 0.25             | 0.56                     | 1.10              | 0.36                 | 0.16                | 0.16                   | 0.36             | 0.56             |                                                             |                   |
| iroB-192 | Cq | Average Lab 1                                    | 27.85            | 28.04            | 27.72                    | 29.52             | 27.15                | 27.81               | 26.59                  | 30.63            | 29.23            | 0.599                                                       | 1.80              |
|          |    | Average Lab 2                                    | 28.94            | 28.77            | 28.65                    | 30.85             | 27.78                | 28.63               | 27.16                  | 31.22            | 30.28            |                                                             |                   |
|          |    | RSD <sub>R</sub> (%)                             | 2.71             | 1.80             | 2.32                     | 3.11              | 1.63                 | 2.05                | 1.51                   | 1.35             | 2.48             |                                                             |                   |
|          |    | R                                                | 2.16             | 1.43             | 1.83                     | 2.63              | 1.26                 | 1.62                | 1.14                   | 1.17             | 2.07             |                                                             |                   |
|          |    | (y <sub>iA</sub> -y <sub>iB</sub> ) <sup>2</sup> | 1.19             | 0.52             | 0.85                     | 1.76              | 0.40                 | 0.67                | 0.33                   | 0.35             | 1.09             |                                                             |                   |
|          | Tm | Average Lab 1                                    | 79.00            | 79.25            | 79.25                    | 79.25             | 79.25                | 79.25               | 79.50                  | 79.25            | 79.00            | 0.389                                                       | 1.17              |
|          |    | Average Lab 2                                    | 78.70            | 78.70            | 78.55                    | 78.55             | 78.70                | 78.70               | 78.90                  | 78.55            | 78.55            |                                                             |                   |
|          |    | RSD <sub>R</sub> (%)                             | 0.27             | 0.49             | 0.63                     | 0.63              | 0.49                 | 0.49                | 0.54                   | 0.63             | 0.40             |                                                             |                   |
|          |    | R                                                | 0.59             | 1.09             | 1.39                     | 1.39              | 1.09                 | 1.09                | 1.19                   | 1.39             | 0.89             |                                                             |                   |
|          |    | (y <sub>iA</sub> -y <sub>iB</sub> ) <sup>2</sup> | 0.09             | 0.30             | 0.49                     | 0.49              | 0.30                 | 0.30                | 0.36                   | 0.49             | 0.20             |                                                             |                   |
| iroB-12  | Cq | Average Lab 1                                    | 29.07            | 29.28            | 28.53                    | 30.63             | 28.22                | 28.71               | 27.70                  | 31.05            | 31.39            | 1.089                                                       | 3.27              |
|          |    | Average Lab 2                                    | 30.46            | 30.36            | 30.37                    | 32.90             | 29.68                | 30.29               | 29.07                  | 33.00            | 32.72            |                                                             |                   |
|          |    | RSD <sub>R</sub> (%)                             | 3.29             | 2.57             | 4.43                     | 5.05              | 3.57                 | 3.80                | 3.41                   | 4.31             | 2.92             |                                                             |                   |
|          |    | R                                                | 2.74             | 2.15             | 3.65                     | 4.49              | 2.89                 | 3.14                | 2.71                   | 3.87             | 2.62             |                                                             |                   |
|          |    | (y <sub>iA</sub> -y <sub>iB</sub> ) <sup>2</sup> | 1.92             | 1.18             | 3.40                     | 5.14              | 2.14                 | 2.51                | 1.87                   | 3.82             | 1.75             |                                                             |                   |
|          | Tm | Average Lab 1                                    | 82.00            | 82.00            | 82.00                    | 82.00             | 82.00                | 82.00               | 82.00                  | 82.00            | 82.00            | 0.415                                                       | 1.24              |
|          |    | Average Lab 2                                    | 81.50            | 81.50            | 81.10                    | 81.10             | 81.50                | 81.50               | 81.40                  | 81.45            | 81.60            |                                                             |                   |
|          |    | RSD <sub>R</sub> (%)                             | 0.43             | 0.43             | 0.78                     | 0.78              | 0.43                 | 0.43                | 0.52                   | 0.48             | 0.35             |                                                             |                   |
|          |    | R                                                | 0.99             | 0.99             | 1.78                     | 1.78              | 0.99                 | 0.99                | 1.19                   | 1.09             | 0.79             |                                                             |                   |
|          |    | (y <sub>iA</sub> -y <sub>iB</sub> ) <sup>2</sup> | 0.25             | 0.25             | 0.81                     | 0.81              | 0.25                 | 0.25                | 0.36                   | 0.30             | 0.16             |                                                             |                   |
| safC-10  | Cq | Average Lab 1                                    | 27.93            | 27.78            | 27.66                    | 29.15             | 26.91                | 27.25               | 26.34                  | 28.88            | 28.85            | 1.461                                                       | 4.38              |
|          |    | Average Lab 2                                    | 29.40            | 29.40            | 29.43                    | 32.19             | 28.66                | 29.11               | 28.27                  | 32.04            | 31.15            |                                                             |                   |
|          |    | RSD <sub>R</sub> (%)                             | 3.62             | 4.00             | 4.38                     | 7.01              | 4.45                 | 4.67                | 5.00                   | 7.34             | 5.42             |                                                             |                   |
|          |    | R                                                | 2.90             | 3.20             | 3.50                     | 6.02              | 3.46                 | 3.69                | 3.82                   | 6.26             | 4.55             |                                                             |                   |
|          |    | (y <sub>iA</sub> -y <sub>iB</sub> ) <sup>2</sup> | 2.15             | 2.62             | 3.12                     | 9.26              | 3.06                 | 3.47                | 3.72                   | 9.99             | 5.28             |                                                             |                   |
|          | Tm | Average Lab 1                                    | 75.50            | 76.00            | 76.00                    | 75.50             | 75.75                | 76.00               | 76.00                  | 76.00            | 76.00            | 0.380                                                       | 1.14              |
|          |    | Average Lab 2                                    | 75.50            | 75.50            | 75.10                    | 74.80             | 75.30                | 75.30               | 75.70                  | 75.55            | 75.40            |                                                             |                   |
|          |    | RSD <sub>R</sub> (%)                             | 0.00             | 0.47             | 0.84                     | 0.66              | 0.42                 | 0.65                | 0.28                   | 0.42             | 0.56             |                                                             |                   |
|          |    | R                                                | 0.00             | 0.99             | 1.78                     | 1.39              | 0.89                 | 1.39                | 0.59                   | 0.89             | 1.19             |                                                             |                   |
|          |    | (y <sub>iA</sub> -y <sub>iB</sub> ) <sup>2</sup> | 0.00             | 0.25             | 0.81                     | 0.49              | 0.20                 | 0.49                | 0.09                   | 0.20             | 0.36             |                                                             |                   |
| safC-13  | Cq | Average Lab 1                                    | 27.37            | 27.67            | 27.95                    | 29.34             | 26.00                | 27.34               | 25.94                  | 28.28            | 29.32            | 1.593                                                       | 4.78              |
|          |    | Average Lab 2                                    | 29.53            | 29.74            | 29.21                    | 31.78             | 28.74                | 29.25               | 28.38                  | 31.79            | 31.50            |                                                             |                   |
|          |    | RSD <sub>R</sub> (%)                             | 5.37             | 5.12             | 3.11                     | 5.65              | 7.09                 | 4.78                | 6.35                   | 8.25             | 5.08             |                                                             |                   |
|          |    | R                                                | 4.27             | 4.12             | 2.49                     | 4.84              | 5.44                 | 3.79                | 4.83                   | 6.94             | 4.33             |                                                             |                   |
|          |    | (y <sub>iA</sub> -y <sub>iB</sub> ) <sup>2</sup> | 4.66             | 4.32             | 1.58                     | 5.96              | 7.54                 | 3.66                | 5.94                   | 12.29            | 4.78             |                                                             |                   |
|          | Tm | Average Lab 1                                    | 78.00            | 77.75            | 78.00                    | 77.75             | 78.00                | 77.50               | 78.00                  | 77.75            | 78.00            | 0.491                                                       | 1.47              |
|          |    | Average Lab 2                                    | 77.25            | 77.40            | 77.10                    | 76.80             | 77.10                | 76.40               | 77.80                  | 77.80            | 77.40            |                                                             |                   |
|          |    | RSD <sub>R</sub> (%)                             | 0.68             | 0.32             | 0.82                     | 0.87              | 0.82                 | 1.01                | 0.18                   | 0.05             | 0.55             |                                                             |                   |
|          |    | R                                                | 1.48             | 0.69             | 1.78                     | 1.88              | 1.78                 | 2.18                | 0.40                   | 0.10             | 1.19             |                                                             |                   |
|          |    | (y <sub>iA</sub> -y <sub>iB</sub> ) <sup>2</sup> | 0.56             | 0.12             | 0.81                     | 0.90              | 0.81                 | 1.21                | 0.04                   | 0.00             | 0.36             |                                                             |                   |
| STM0296  | Cq | Average Lab 1                                    | 28.17            | 27.88            | 27.91                    | 30.41             | 27.04                | 27.33               | 26.49                  | 29.28            | 29.50            | 0.308                                                       | 0.92              |
|          |    | Average Lab 2                                    | 28.21            | 28.66            | 28.69                    | 30.41             | 27.51                | 27.43               | 26.66                  | 29.73            | 29.04            |                                                             |                   |
|          |    | RSD <sub>R</sub> (%)                             | 0.10             | 1.95             | 1.95                     | 0.00              | 1.22                 | 0.26                | 0.45                   | 1.08             | 1.11             |                                                             |                   |
|          |    | R                                                | 0.08             | 1.54             | 1.54                     | 0.00              | 0.93                 | 0.20                | 0.34                   | 0.89             | 0.91             |                                                             |                   |
|          |    | (y <sub>iA</sub> -y <sub>iB</sub> ) <sup>2</sup> | 0.00             | 0.61             | 0.61                     | 0.00              | 0.22                 | 0.01                | 0.03                   | 0.20             | 0.21             |                                                             |                   |
|          | Tm | Average Lab 1                                    | 77.00            | 76.25            | 77.00                    | 77.00             | 77.00                | 77.25               | 77.00                  | 77.75            | 76.75            | 0.131                                                       | 0.39              |
|          |    | Average Lab 2                                    | 77.15            | 76.20            | 76.85                    | 76.70             | 77.15                | 77.30               | 76.85                  | 77.75            | 77.15            |                                                             |                   |
|          |    | RSD <sub>R</sub> (%)                             | 0.14             | 0.05             | 0.14                     | 0.28              | 0.14                 | 0.05                | 0.14                   | 0.00             | 0.37             |                                                             |                   |
|          |    | R                                                | 0.30             | 0.10             | 0.30                     | 0.59              | 0.30                 | 0.10                | 0.30                   | 0.00             | 0.79             |                                                             |                   |
|          |    | (y <sub>iA</sub> -y <sub>iB</sub> ) <sup>2</sup> | 0.02             | 0.00             | 0.02                     | 0.09              | 0.02                 | 0.00                | 0.02                   | 0.00             | 0.16             |                                                             |                   |
